# Supplementary material
Source: PubMed Central journal article supplement (PMC3413172)

**A**

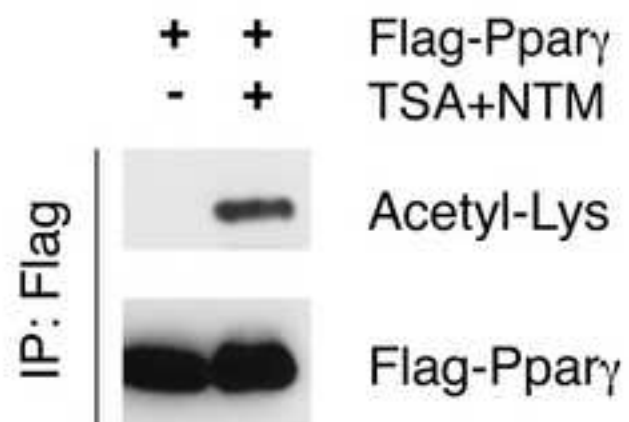

**B**

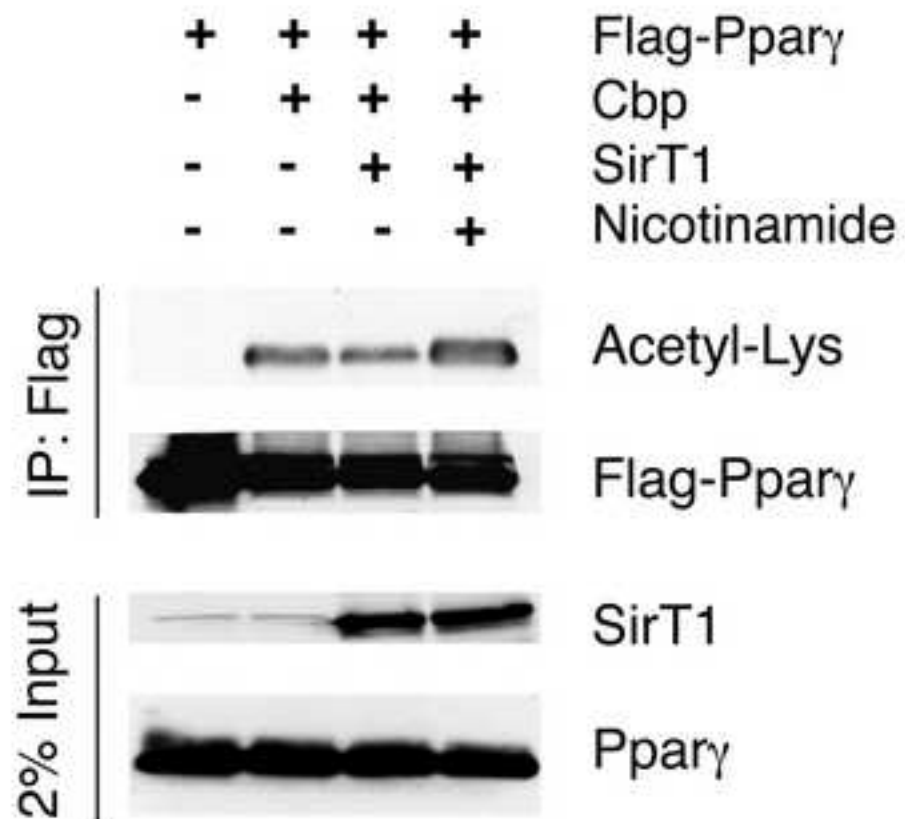

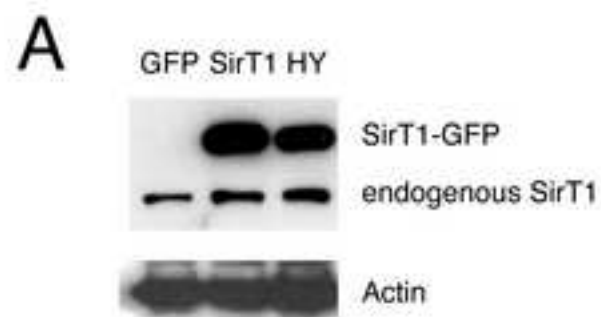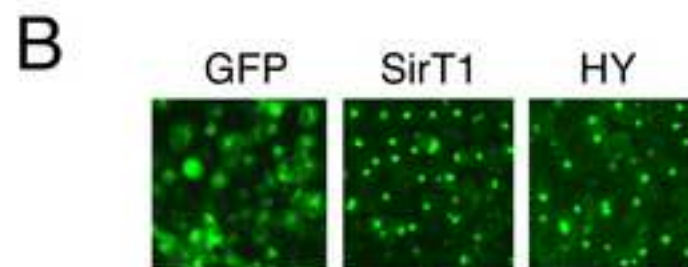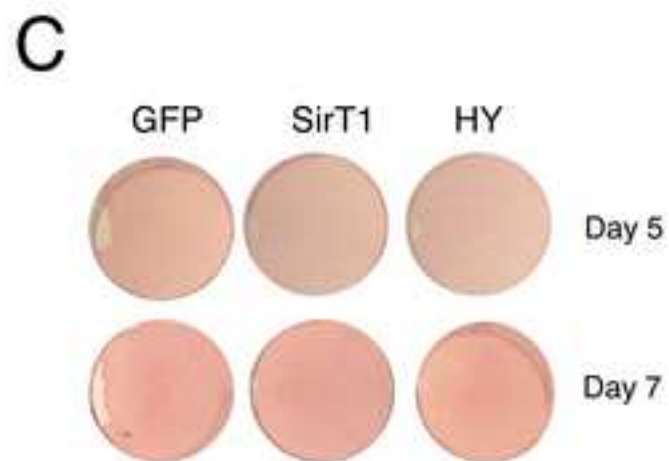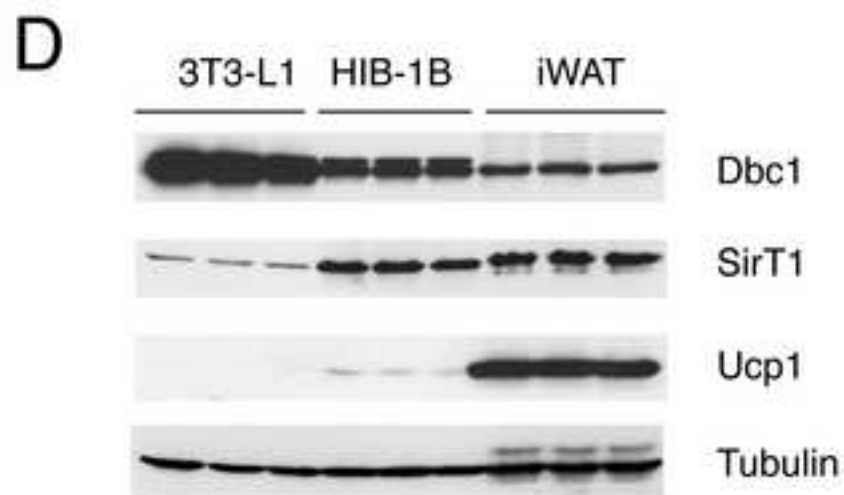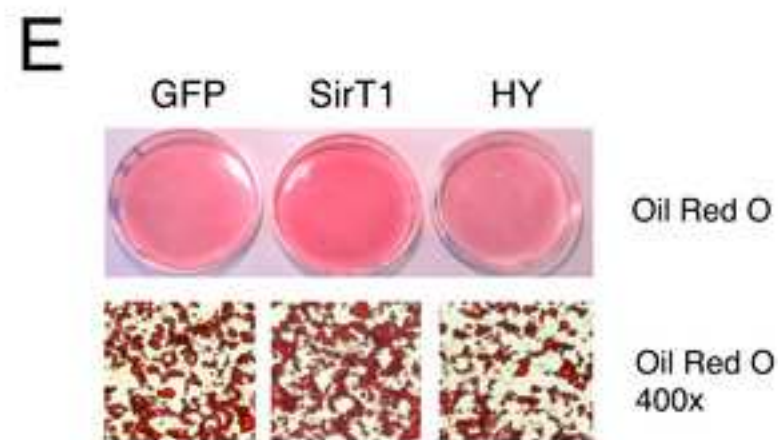

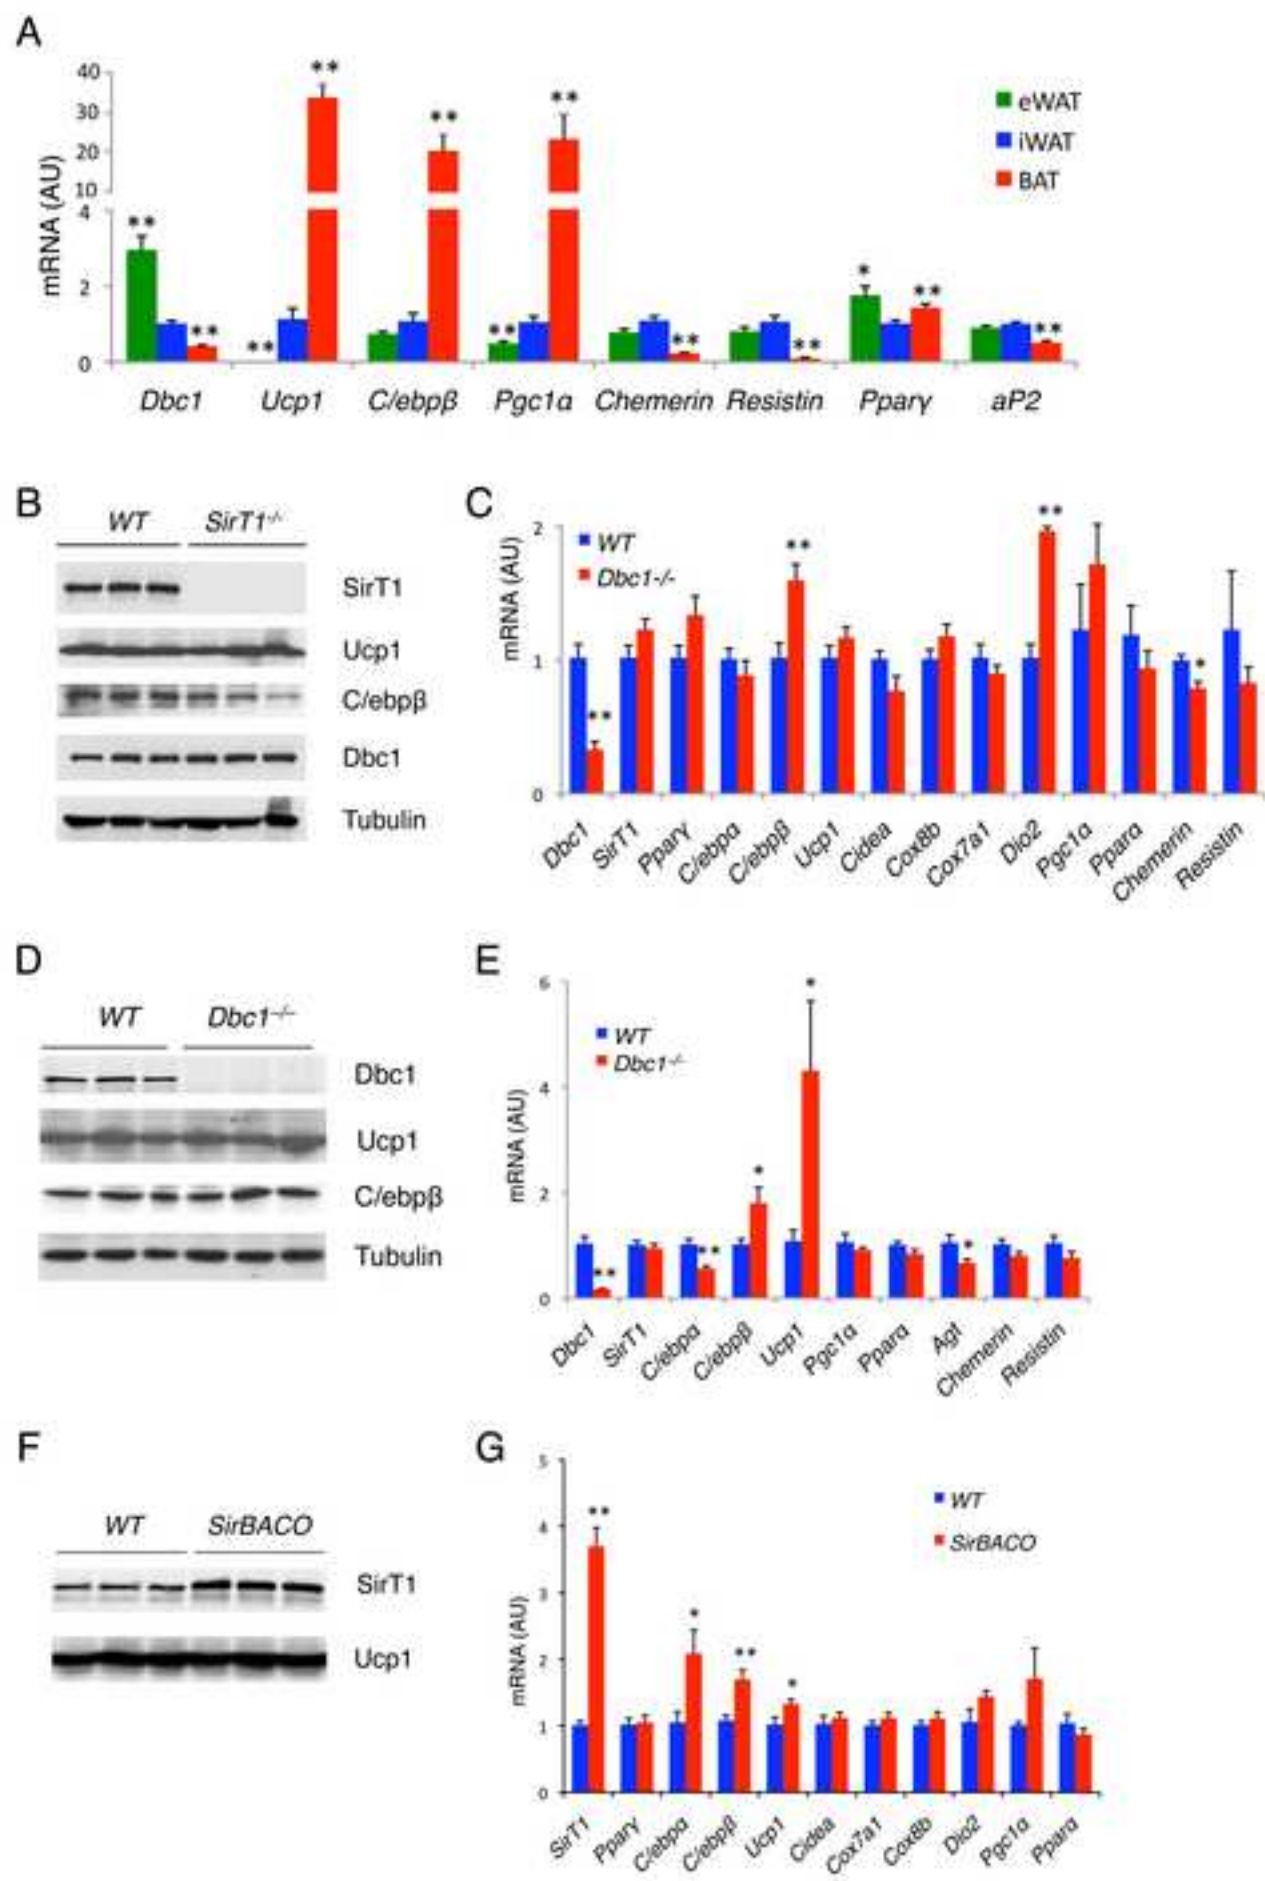

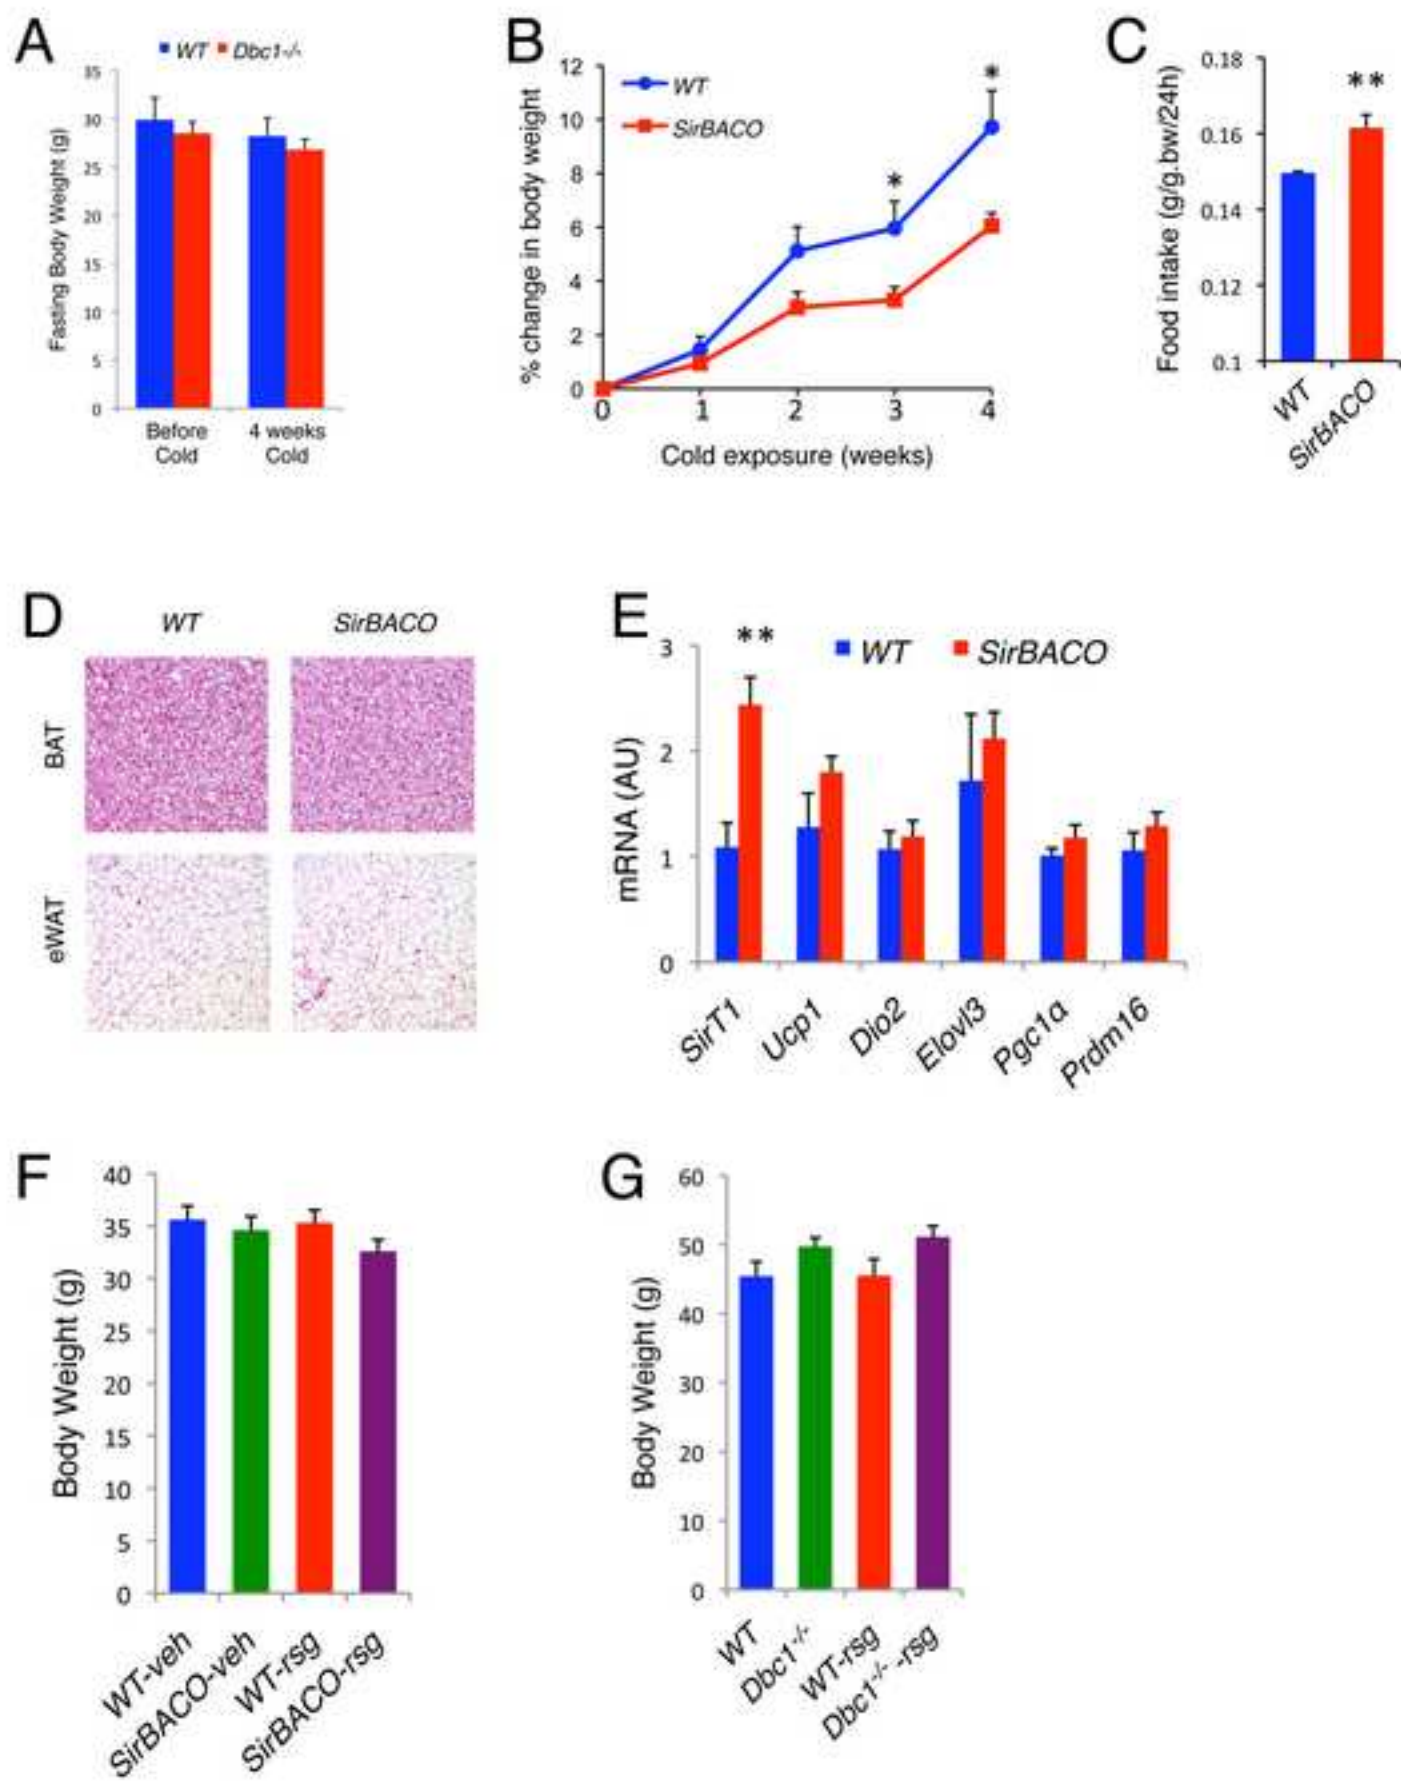

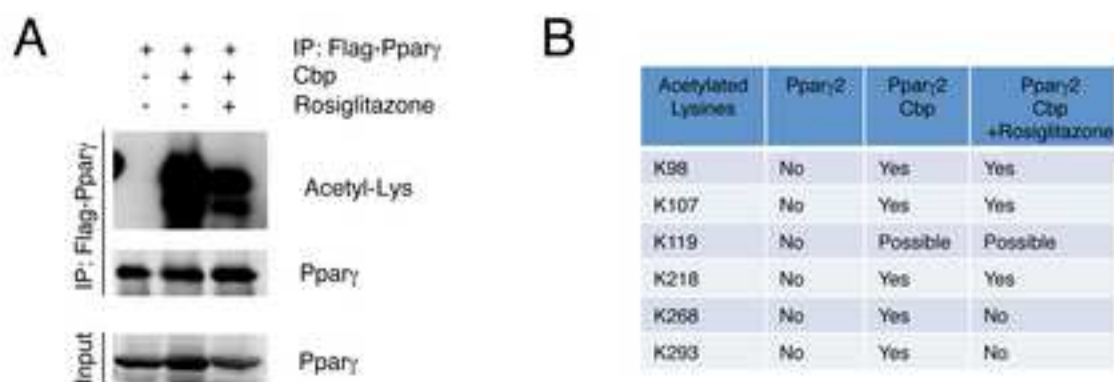

**C** PPARs helix 2-helix 2' alignment:

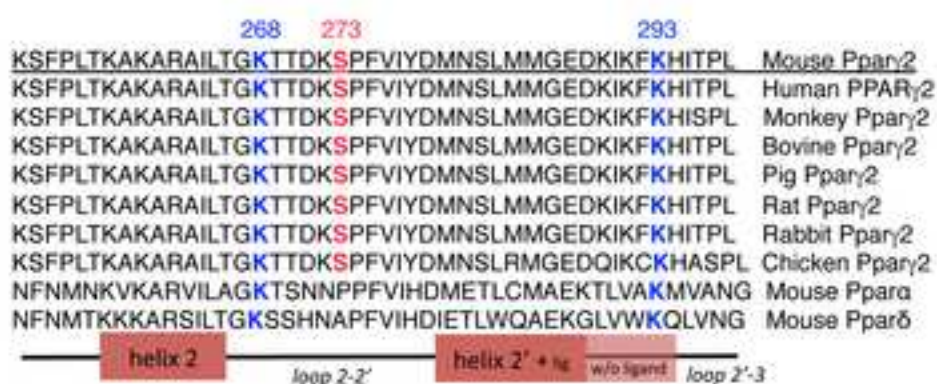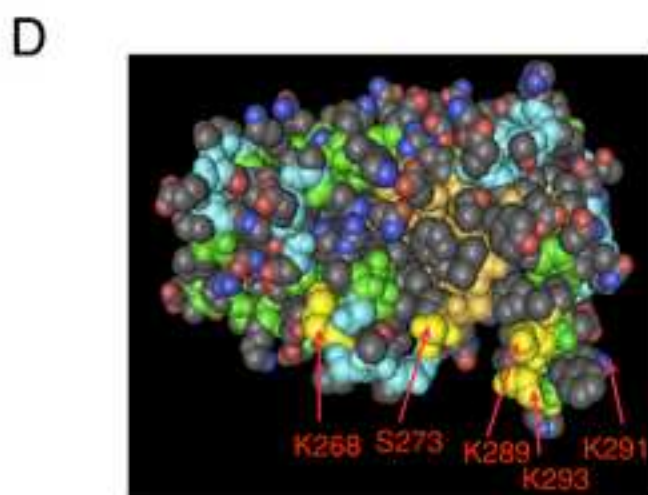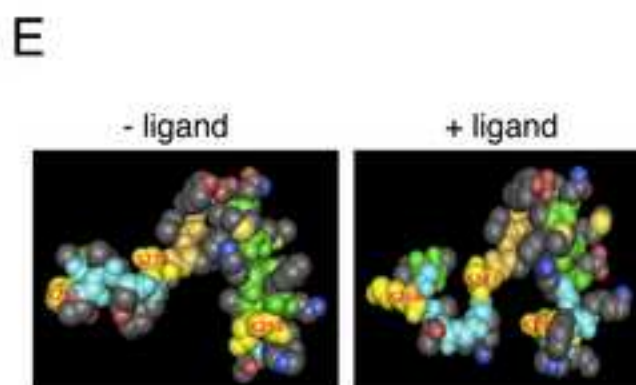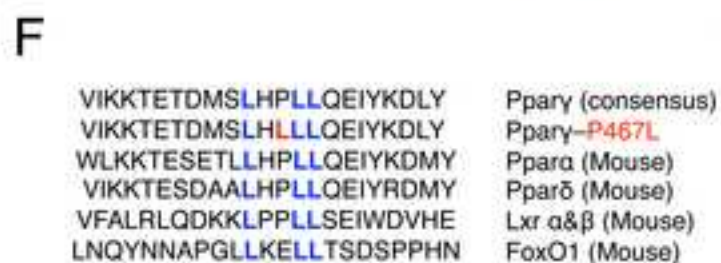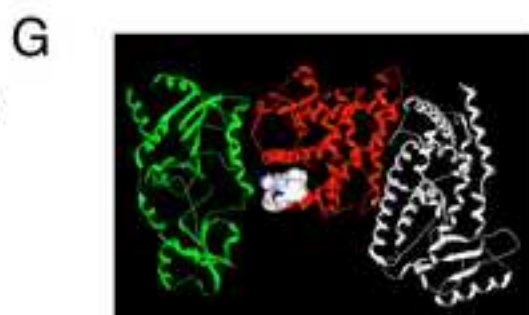

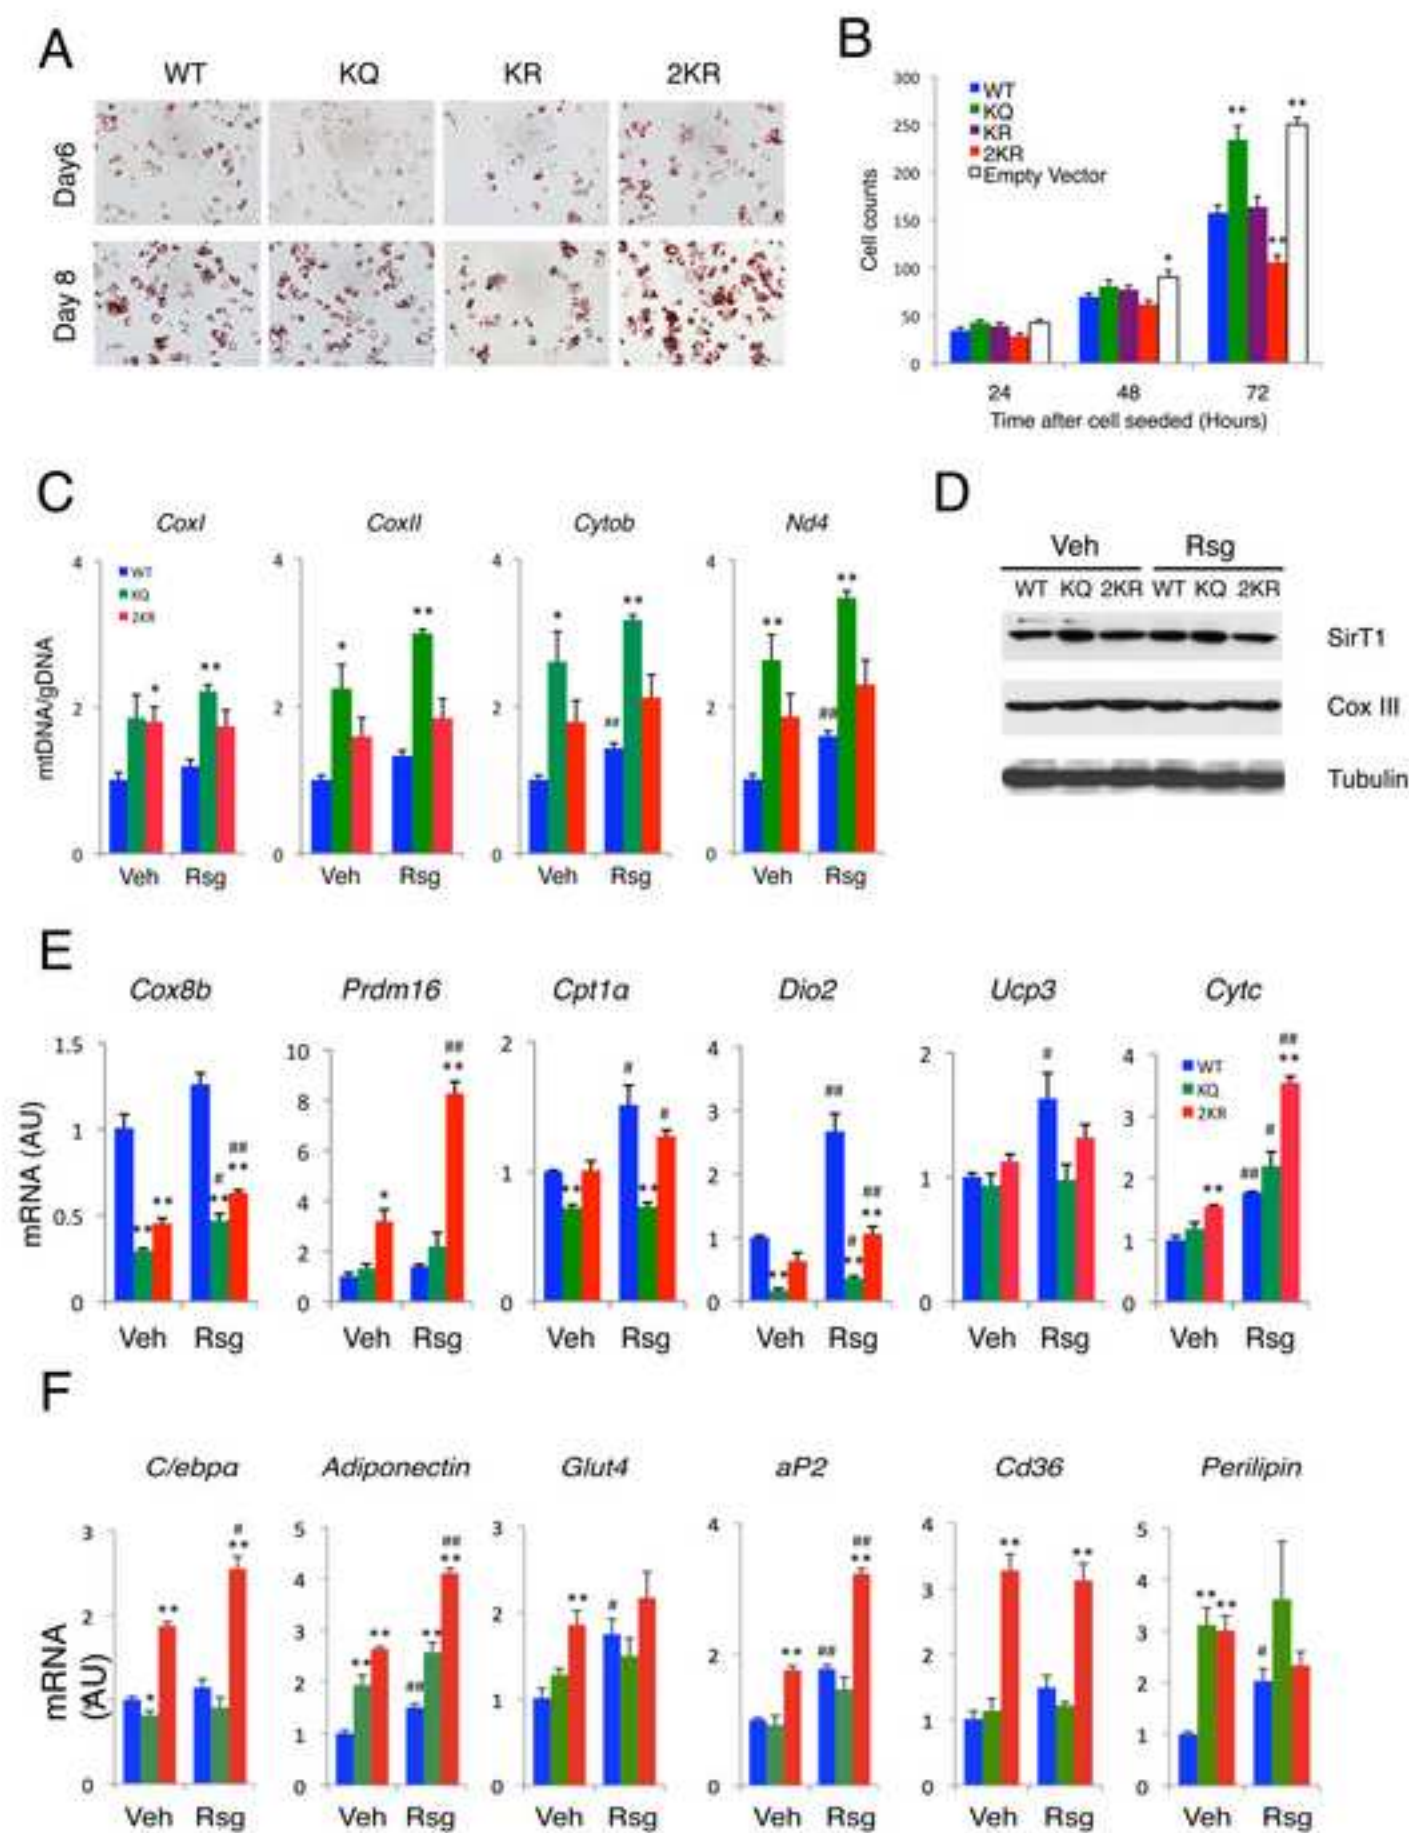

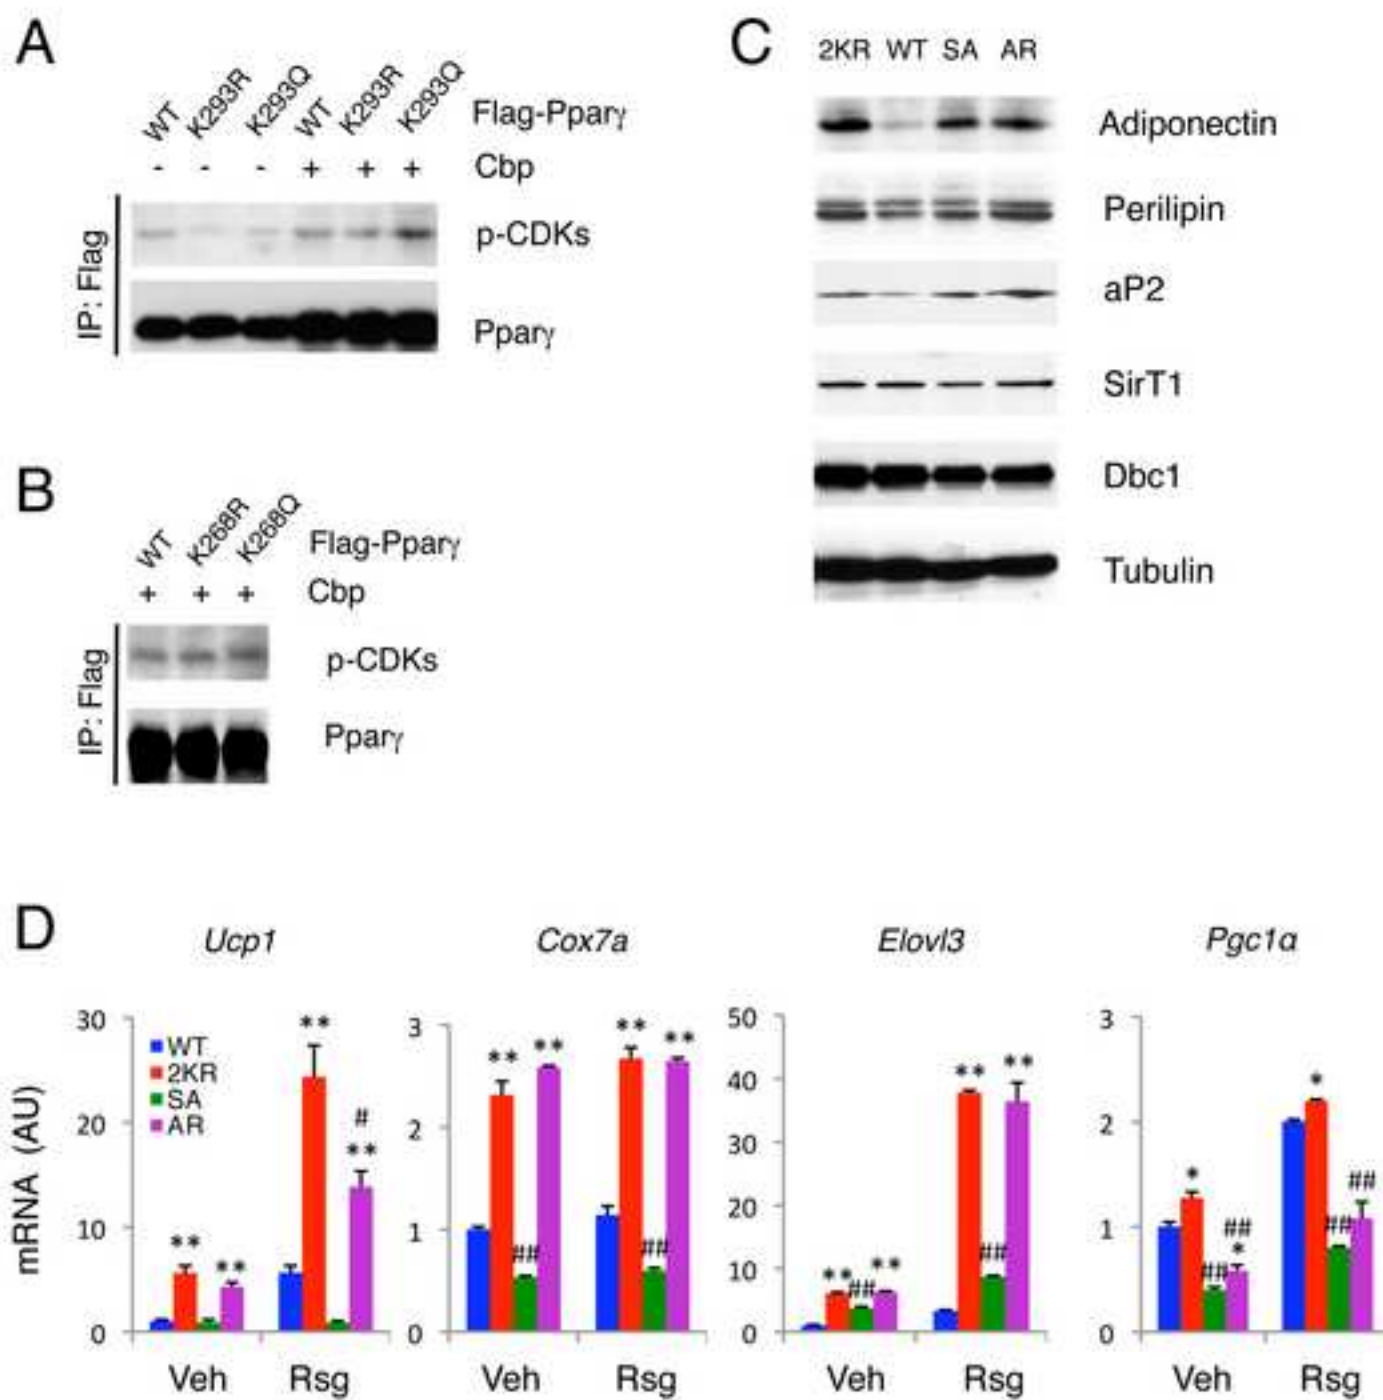

Supplement: NIHMS391182-supplement-02.pdf [file NIHMS391182-supplement-02.pdf]
